# Supplementary material for: Shade-induced nuclear localization of PIF7 is regulated by phosphorylation and 14-3-3 proteins in Arabidopsis
Source: eLife journal article supplement (doi:10.7554/elife.31636), 2018-06-21
Supplement: supp [file elife-31636-supp-v1.zip]

Archive with 14 entries (14 files):
- elife_poa_e31636_Figure_3_figure_supplement_3.pdf
- elife_poa_e31636_Figure_5_source_data_1.docx
- elife_poa_e31636_Figure_1_figure_supplement_1.pdf
- elife_poa_e31636_Figure_2_figure_supplement_1.pdf
- elife_poa_e31636_Supplementary_File_1.docx
- elife_poa_e31636_Figure_3_figure_supplement_2.pdf
- elife_poa_e31636_Figure_6_figure_supplement_1.pdf
- elife_poa_e31636_Figure_3_figure_supplement_1.pdf
- elife_poa_e31636_Figure_5_source_data_2.docx
- elife_poa_e31636_Figure_1_source_data_1.docx
- elife_poa_e31636_Figure_5_figure_supplement_2.pdf
- elife_poa_e31636_Figure_5_figure_supplement_1.pdf
- elife_poa_e31636_Figure_4_figure_supplement_1.pdf
- elife_poa_e31636_Transparent_Reporting_File.docx
