# Supplementary material for: Shade-induced nuclear localization of PIF7 is regulated by phosphorylation and 14-3-3 proteins in Arabidopsis
Source: eLife journal article supplement (doi:10.7554/elife.31636), 2018-06-21
Supplement: supp [file elife-31636-supp-v1.zip]

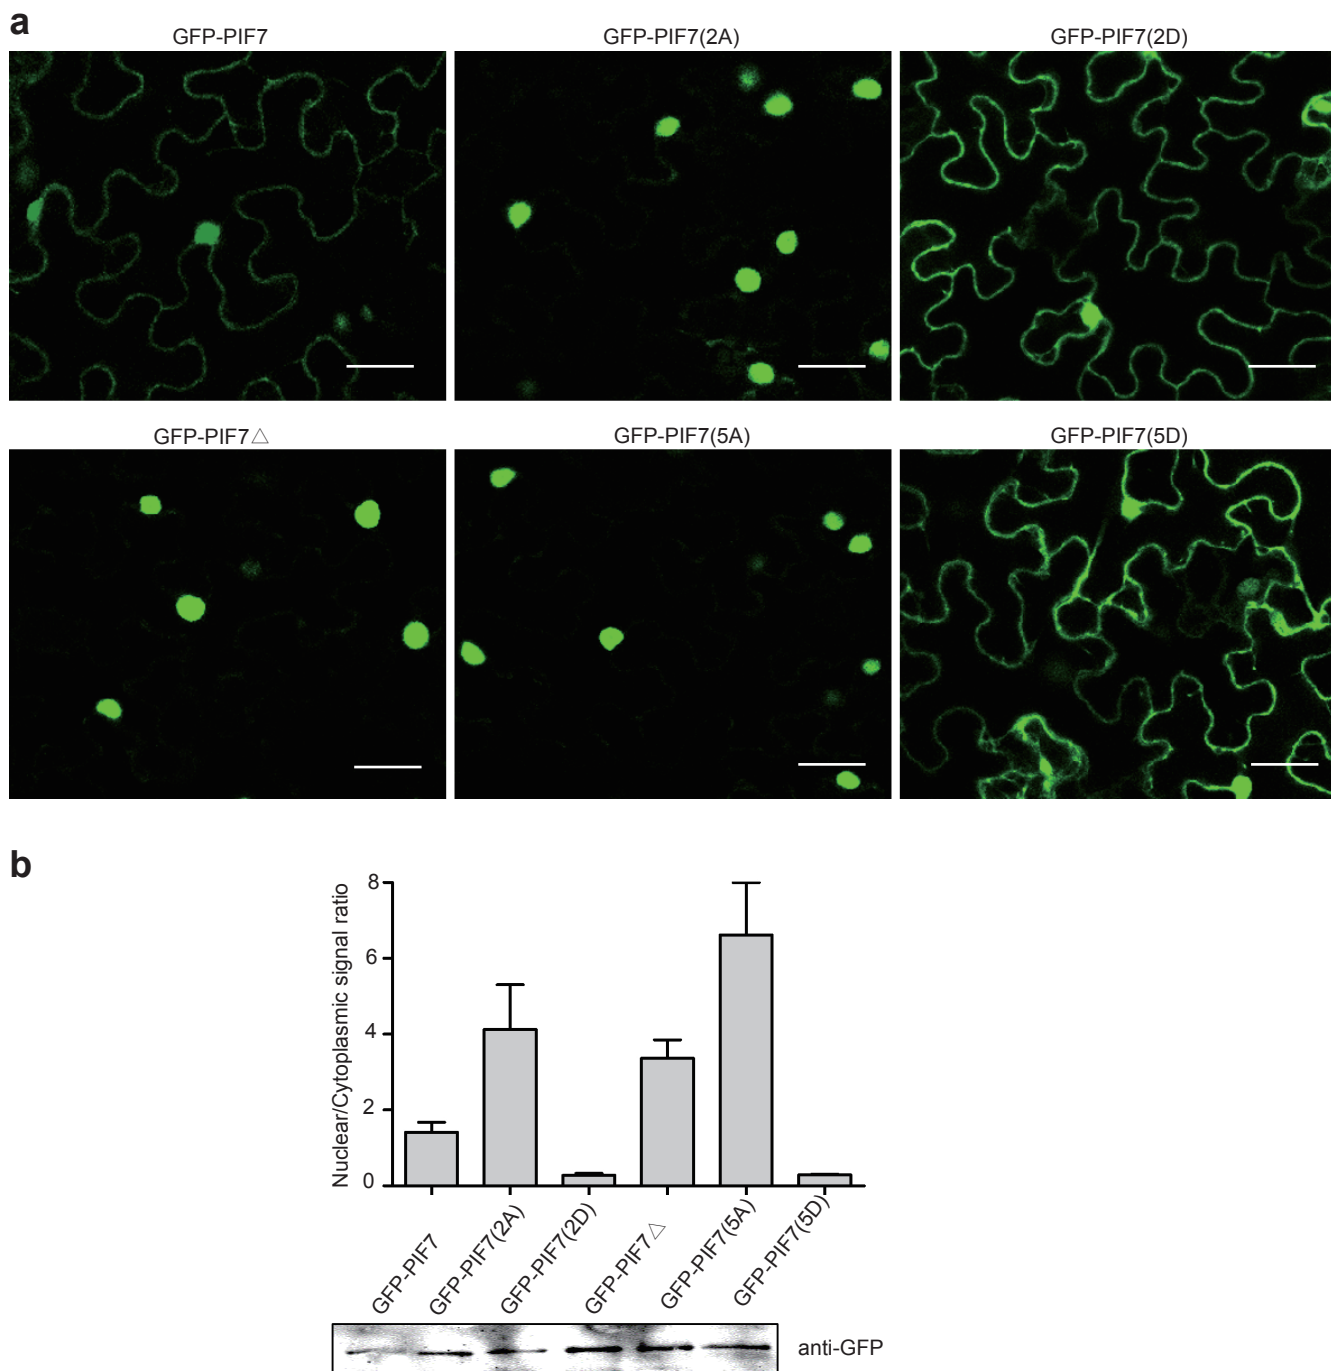

**Figure 4-figure supplement 1.** Subcellular localization of GFP-PIF7, GFP-PIF7(2A), GFP-PIF7 (2D), GFP-PIF7 $\Delta$ , GFP-PIF7(5A) and GFP-PIF7 (5D) in tobacco cells. (a) Images of GFP-PIF7, GFP-PIF7(2A), GFP-PIF7 (2D), GFP-PIF7 $\Delta$ , GFP-PIF7(5A) and GFP-PIF7(5D) in tobacco cells. White bar represents 25  $\mu$  m. (b) Quantification of the ratios between of the nuclear and cytoplasmic intensities of GFP related to Figure 4a and Figure 4-figure supplement 1a. Immunoblot of GFP-PIF7, GFP-PIF7(2A), GFP-PIF7(2D), GFP-PIF7 $\Delta$ , GFP-PIF7(5A) and GFP-PIF7(5D) in tobacco cells detected by anti-GFP antibody are shown at the bottom.
