# Supplementary material for: Shade-induced nuclear localization of PIF7 is regulated by phosphorylation and 14-3-3 proteins in Arabidopsis
Source: eLife journal article supplement (doi:10.7554/elife.31636), 2018-06-21
Supplement: supp [file elife-31636-supp-v1.zip › elife_poa_e31636_Figure_1_figure_supplement_1.pdf]

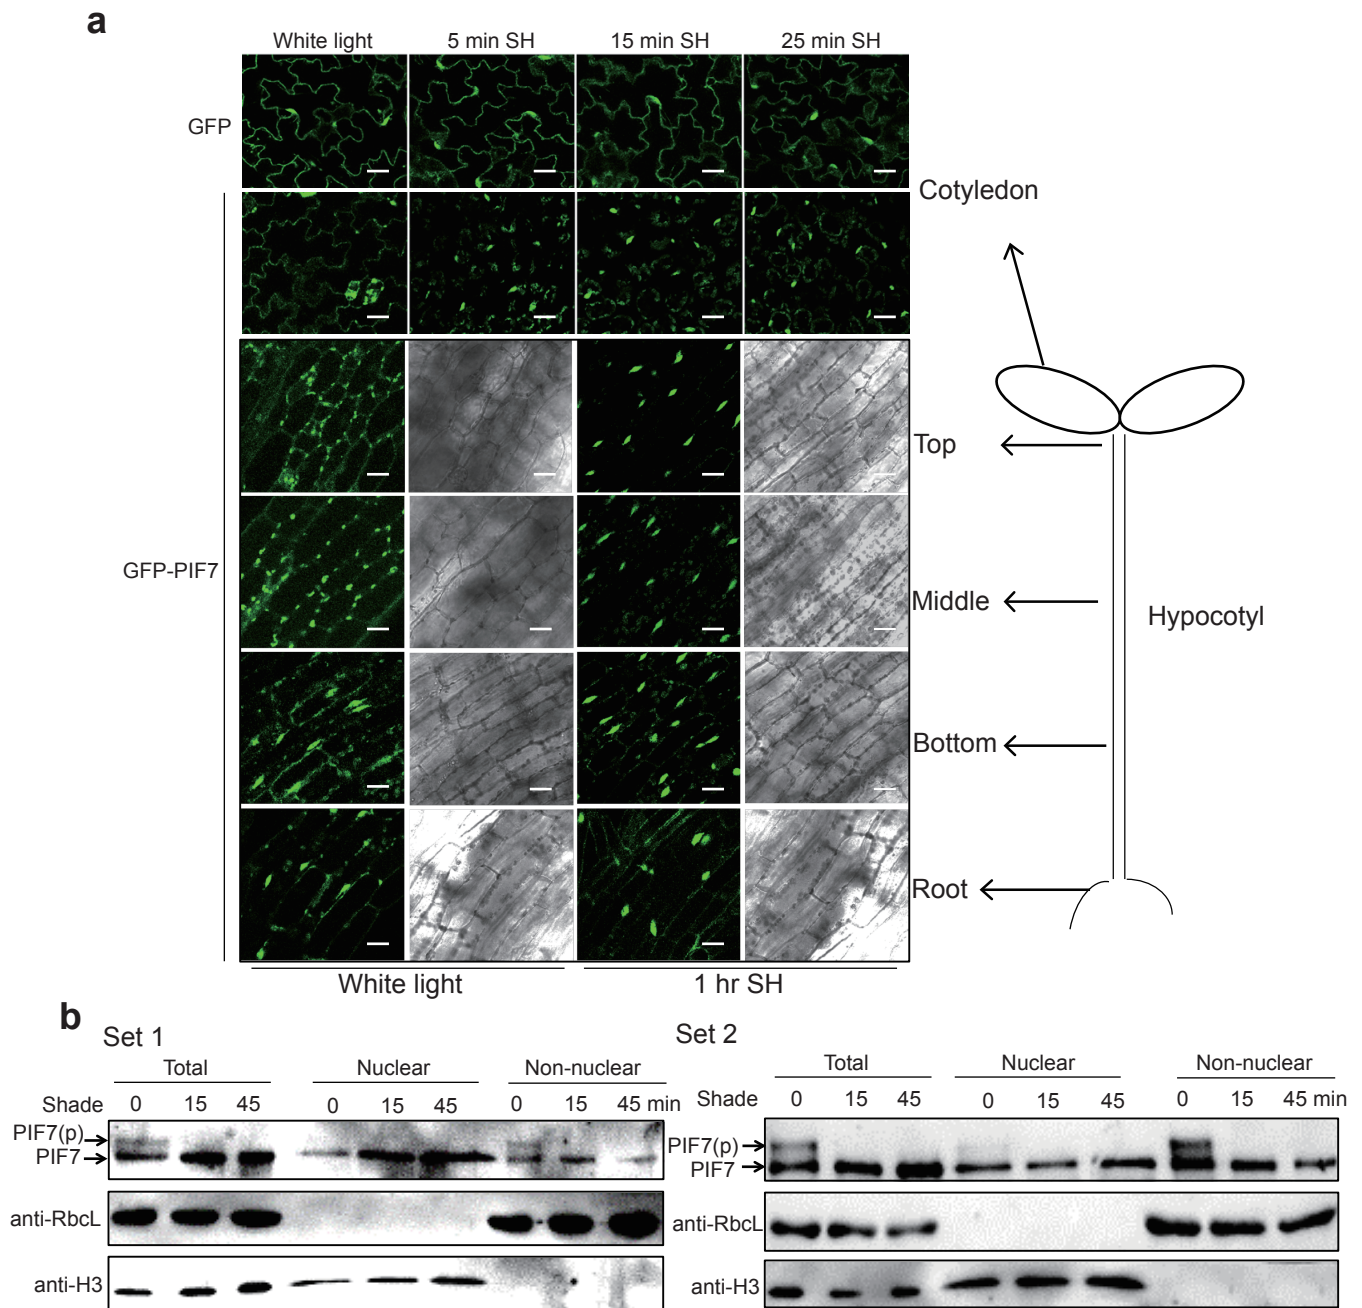

**Figure 1-figure supplement 1.** Shade induces the nuclear localization of PIF7 in the hypocotyl and cotyledon. (a) Subcellular localization of GFP-PIF7 in the cotyledon, the top, middle and bottom portions of the hypocotyls, and the root of transgenic seedlings grown under white light or transferred to shade for the indicated periods. White scale bar represents 25  $\mu$ m. (b) Immunoblots show that shade induces the nuclear localization of dephosphorylated PIF7. Immunoblot of PIF7-Flash proteins using anti-Myc antibody in the total, nuclear and non-nuclear fractions from white light- and shade-treated seedlings. The same amount of the sample was loaded in the different gels for detections using different antibodies.
