# Supplementary material for: Shade-induced nuclear localization of PIF7 is regulated by phosphorylation and 14-3-3 proteins in Arabidopsis
Source: eLife journal article supplement (doi:10.7554/elife.31636), 2018-06-21
Supplement: supp [file elife-31636-supp-v1.zip › elife_poa_e31636_Figure_2_figure_supplement_1.pdf]

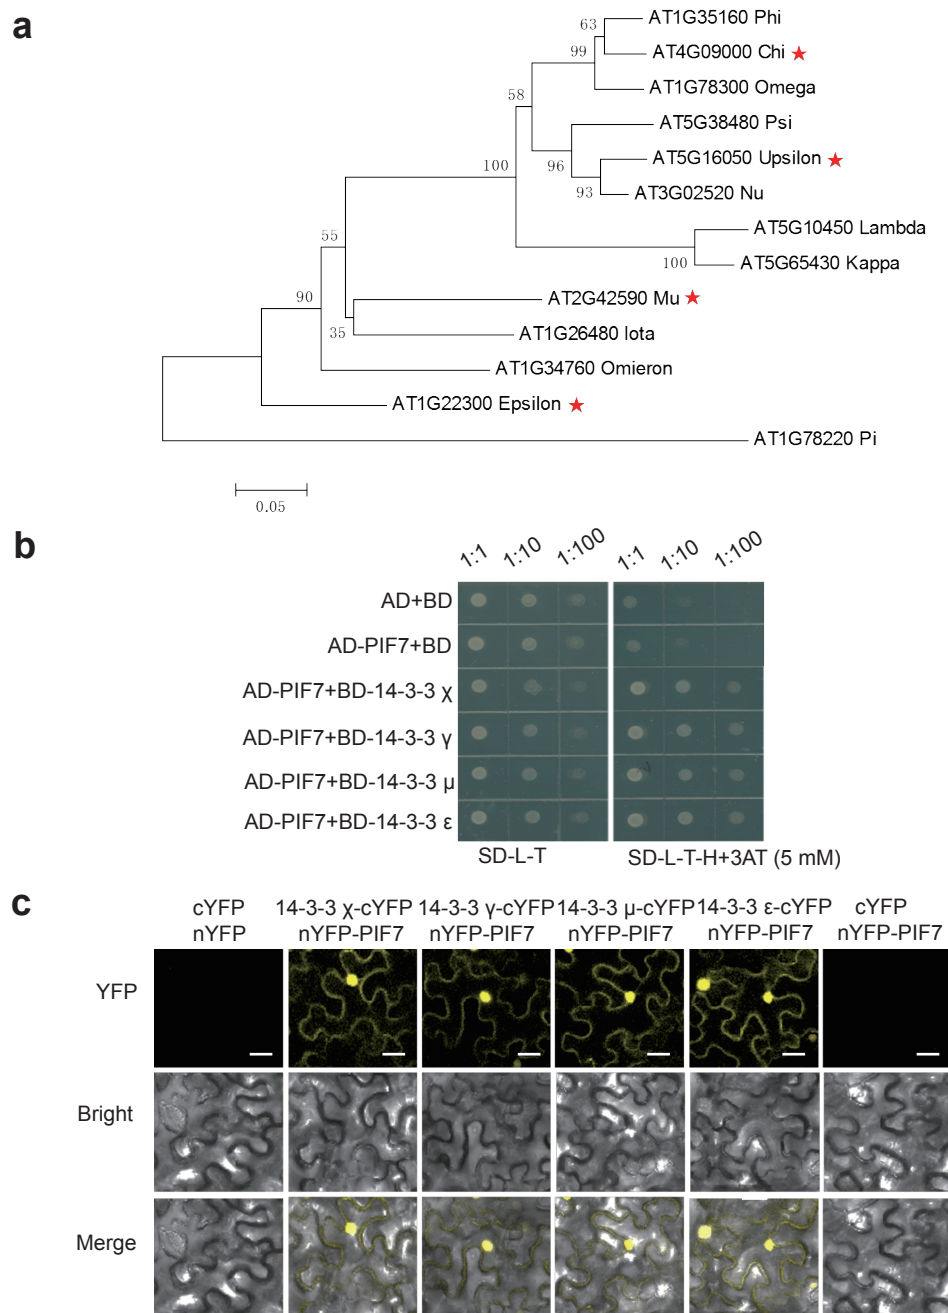

**Figure 2- figure supplement 1.** PIF7 can interact with 14-3-3  $\chi$ ,  $\gamma$ ,  $\mu$  and  $\epsilon$  proteins. (a) Phylogenetic tree of 14-3-3 proteins in *Arabidopsis*. The tree was generated using predicted full-length amino acid sequences and neighbor-joining in MEGA5. The numbers on the nodes indicate the confidence values when 1000 replications were used. The positions of 14-3-3  $\chi$ ,  $\gamma$ ,  $\mu$  and  $\epsilon$  are marked by red stars. (b) PIF7 interacts with 14-3-3  $\chi$ ,  $\gamma$ ,  $\mu$  and  $\epsilon$  in a yeast two-hybrid assay. Each yeast clone containing the pGADT7 (AD) or pGADT7-PIF7 (AD-PIF7), together with pGBKT7 (BD) or pGBKT7-14-3-3  $\chi$ ,  $\gamma$ ,  $\mu$  or  $\epsilon$  (BD-14-3-3  $\chi$ ,  $\gamma$ ,  $\mu$  or  $\epsilon$ ), was grown on transformation selection (SD-L-T) or interaction selection (SD-L-T-H+3AT) plates. Dilution of the inoculation is shown at the top of the picture. (c) Interaction between PIF7 and 14-3-3  $\chi$ ,  $\gamma$ ,  $\mu$  or  $\epsilon$  detected by BiFC. The C-terminal half of YFP was fused to 14-3-3  $\chi$ ,  $\gamma$ ,  $\mu$  or  $\epsilon$  and N-terminal half of YFP was fused to PIF7. The constructs were co-transformed into tobacco leaf cells, and fluorescence images were obtained by confocal microscopy. White scale bar represents 75  $\mu$ m.
