# Supplementary material for: Shade-induced nuclear localization of PIF7 is regulated by phosphorylation and 14-3-3 proteins in Arabidopsis
Source: eLife journal article supplement (doi:10.7554/elife.31636), 2018-06-21
Supplement: supp [file elife-31636-supp-v1.zip › elife_poa_e31636_Figure_3_figure_supplement_1.pdf]

a

R/K - x x **S** x P      Mode I  
 R/K x x x **S** x P      Mode II  
 R K S **S** L S      PHOT1  
 RDYF R **S** G **S** ETQD      PIF7(S139,S141)  
 RDYF R A G A ETQD      PIF7(2A)  
 RDYF R D G D ETQD      PIF7(2D)  
 RDYF - - - - ETQD      PIF7△  
 KTV**S**LC      CDC25C  
 KDG**S**CS      PIF7(S78,S80 )  
 PIF7(5A): S78A,S80A,S125A,S139A,S141A  
 PIF7(5D): S78D,S80D,S125D,S139D,S141D

b

| Light condition | Sequence              | Modifications | Phospho site Probabilities   |
|-----------------|-----------------------|---------------|------------------------------|
| White light     | SGSETQDTEGDEQETR      | S3(Phospho)   | S(1):50.0;S(3):50.0          |
| White light     | SGSETQDTEGDEQETR      | S1(Phospho)   | S(1):50.0;S(3):50.0          |
| White light     | SGSETQDTEGDEQETR      | S3(Phospho)   | S(1):6.1;S(3):93.4; T(5):0.4 |
| 5 min Shade     | SGSETQDTEGDEQETRGEAGR | S3(Phospho)   | S(1):8.1;S(3):91.8;T(5):0.1  |
| 5 min Shade     | SGSETQDTEGDEQETR      |               |                              |
| 1hr Shade       | SGSETQDTEGDEQETR      |               |                              |
| 1hr Shade       | SGSETQDTEGDEQETR      |               |                              |

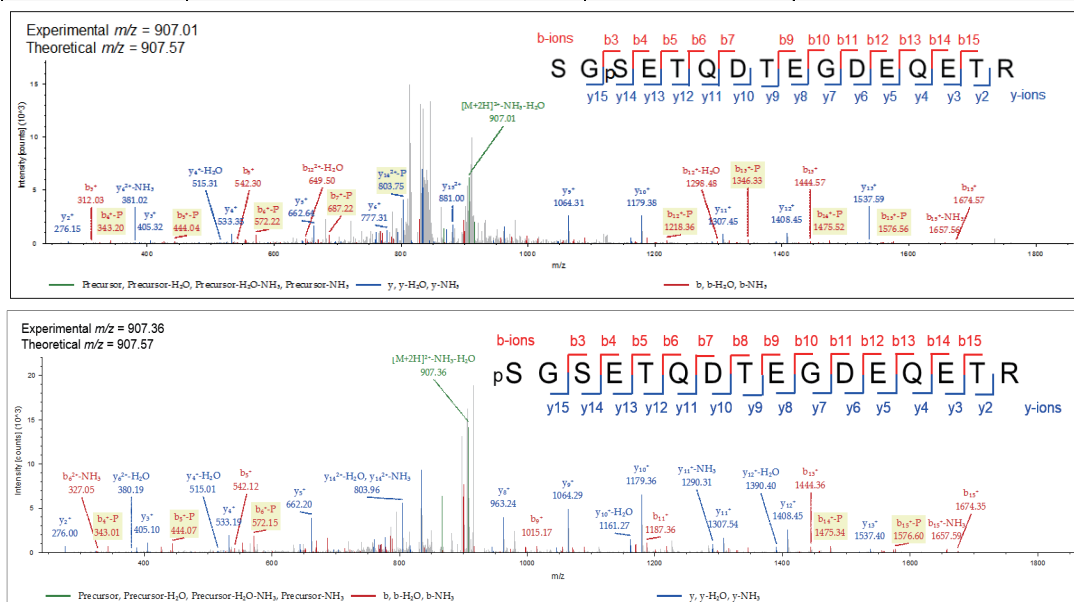

c

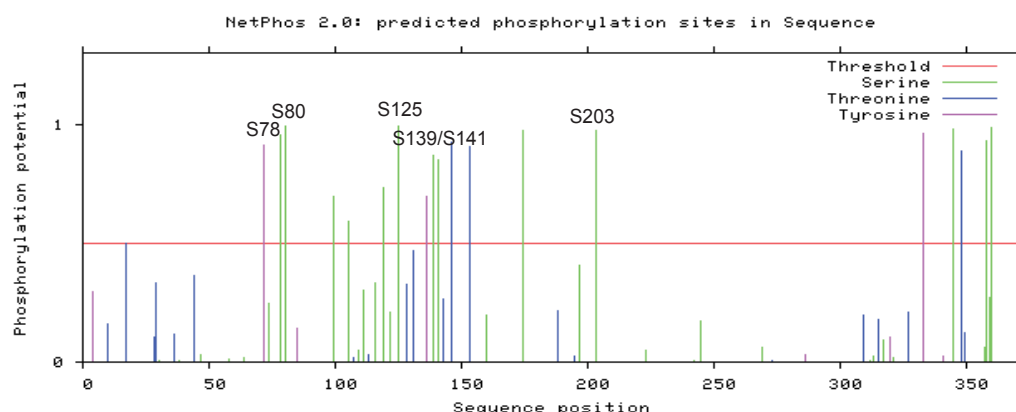

**Figure 3-figure supplement 1.** Potential phosphorylation sites on PIF7. (a) Two known 14-3-3 binding sequences (mode I and mode II) and putative 14-3-3 binding sequences in PIF7, PHOT1 and CDC25C are listed. The consensus phosphorylation sites are labeled in red. S139 and S141 of PIF7 were identified by LC-MS/MS from PIF7 immunoprecipitated proteins isolated from transgenic plants overexpressing PIF7-Flash. S78 and S80 of PIF7 were predicted as phosphorylation sites by NetPhos 2.0. (b) Identification of PIF7 phosphorylation sites from an LC-MS/MS experiment using immunoprecipitated PIF7 proteins isolated from 35S::PIF7-Flash transgenic plants. The light treatment of the samples, the sequence of the mapped peptide, the modifications of the peptide and the probability for each site are presented in the table. The peptide with phosphorylated modifications was identified by mass spectrometry. (c) Phosphorylation sites of PIF7 as predicted by NetPhos 2.0 (<http://www.cbs.dtu.dk/services/NetPhos/>).
