# Supplementary material for: Shade-induced nuclear localization of PIF7 is regulated by phosphorylation and 14-3-3 proteins in Arabidopsis
Source: eLife journal article supplement (doi:10.7554/elife.31636), 2018-06-21
Supplement: supp [file elife-31636-supp-v1.zip › elife_poa_e31636_Figure_3_figure_supplement_2.pdf]

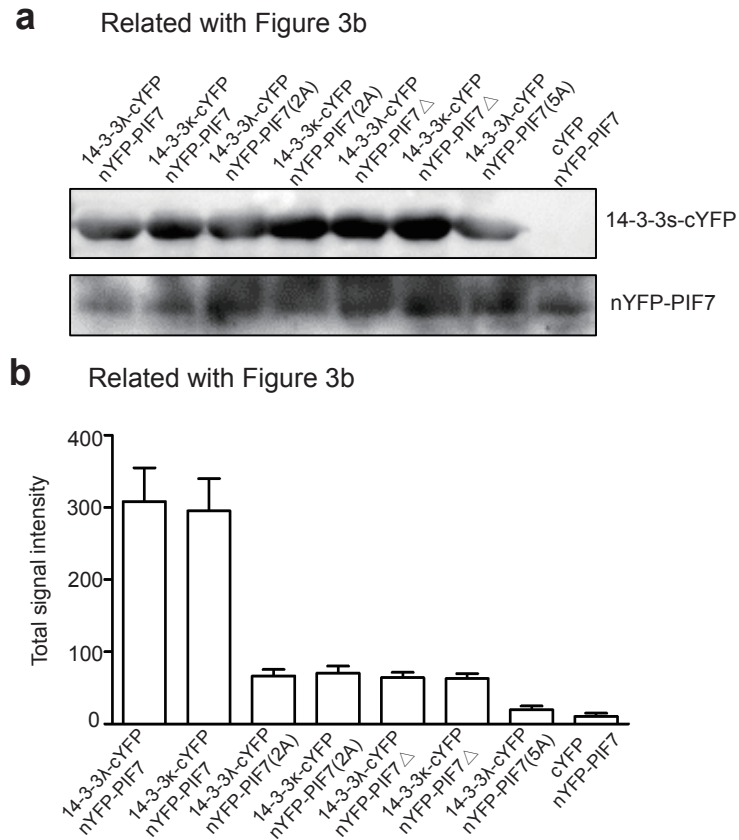

**Figure 3-figure supplement 2.** Expression of 14-3-3 proteins and PIF7 and quantification of signals of YFP in Figure 3b. (a) Anti-GFP antibody from Covance (MMS-118P-200G) was used to detect the nYFP-tagged protein. Anti-14-3-3 antibody from Agrisera (AS12 2119) was used to detect 14-3-3 λ-cYFP. The tobacco leaves were collected for western blotting 36 hr after infiltration. (b) Quantification of the YFP signals in Figure 3b.
