# Supplementary material for: Shade-induced nuclear localization of PIF7 is regulated by phosphorylation and 14-3-3 proteins in Arabidopsis
Source: eLife journal article supplement (doi:10.7554/elife.31636), 2018-06-21
Supplement: supp [file elife-31636-supp-v1.zip › elife_poa_e31636_Figure_3_figure_supplement_3.pdf]

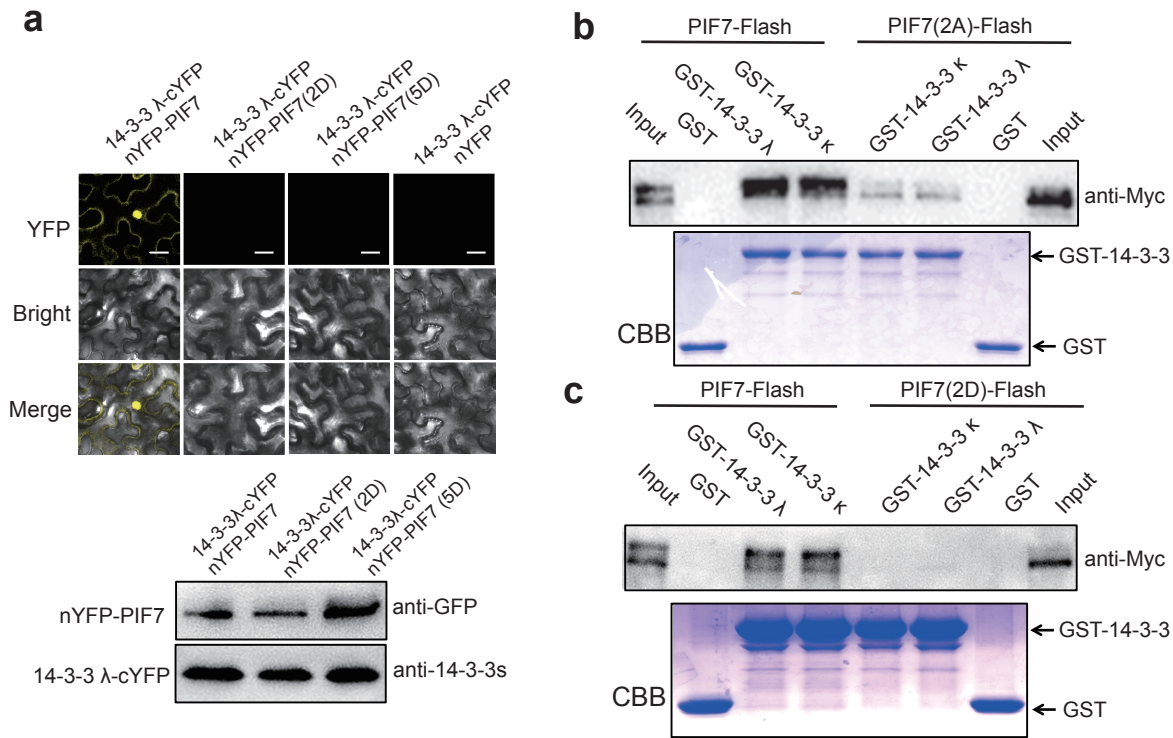

**Figure 3-figure supplement 3.** Interactions between PIF7, PIF7(2A) or PIF7(2D) and 14-3-3 λ or 14-3-3 κ in BiFC and in a pull-down assay. (a) Interaction between PIF7(2D) or PIF7(5D) and 14-3-3 λ as detected by BiFC. The C-terminal half of YFP was fused to 14-3-3 λ and the N-terminal half of YFP was fused to PIF7, PIF7(2D) or PIF7(5D). White scale bar represents 75 μm. The expression of the 14-3-3 λ protein and PIF7(2D) or PIF7(5D) are presented at the bottom. Anti-GFP antibody was used to detect the nYFP-tagged protein. Anti-14-3-3 antibody was used to detect 14-3-3s. (b, c) Interactions between PIF7 and PIF7(2A) (b) or PIF7(2D) (c) and 14-3-3 λ or 14-3-3 κ were detected using a semi-*in vivo* pull-down assay. 14-3-3 λ and 14-3-3 κ fused with GST were expressed and purified from *E. coli*. Protein extracts from plants overexpressing PIF7-Flash, PIF7(2A)-Flash and PIF7(2D)-Flash grown under white-light conditions. Immunoblot of PIF7-Flash proteins using anti-Myc antibody. CBB: Coomassie Brilliant Blue stain.
