# Supplementary material for: Shade-induced nuclear localization of PIF7 is regulated by phosphorylation and 14-3-3 proteins in Arabidopsis
Source: eLife journal article supplement (doi:10.7554/elife.31636), 2018-06-21
Supplement: supp [file elife-31636-supp-v1.zip › elife_poa_e31636_Figure_5_figure_supplement_1.pdf]

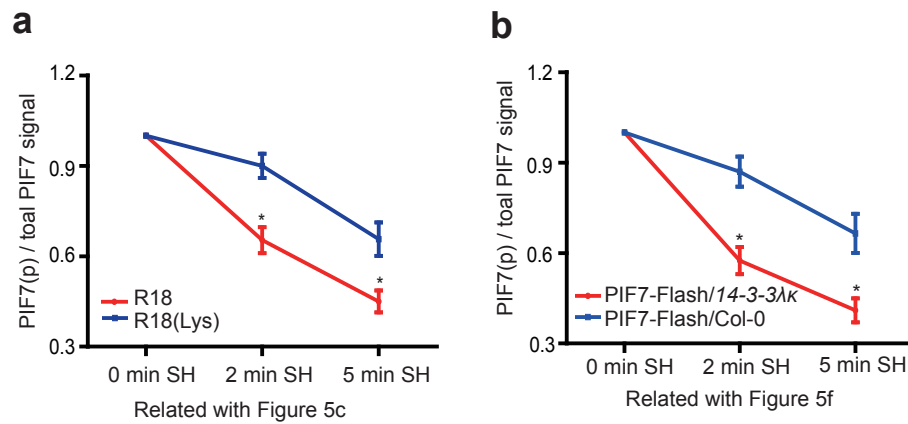

**Figure 5-figure supplement 1.** Quantification of phosphorylated PIF7(PIF7[p]) relative to total PIF7 proteins in Figure 5c and 5f. (a) Quantification of R18 and R18(Lys) treatment in Figure 5c. (b) Quantification of PIF7-Flash/14-3-3λκ and PIF7-Flash/Col-0 background in Figure 5f. The intensities of phosphorylated PIF7 (top) and total PIF7 proteins were measured using Image J (<http://rsb.info.nih.gov/ij/>). The original images were converted to 8-bit format and then inverted so the background was dark and the bands were white. The signal intensity was integrated from all pixels in the selected area. The intensities of top bands were measured as phosphorylated PIF7 and the intensities of all bands as total PIF7 proteins. The ratios of phosphorylated PIF7 relative to total PIF7 proteins were calculated. The ratio at 0 min SH was set artificially as 1.0, and the ratio at 2 min SH / 5 min SH were normalized to it. . Quantitative data in (a) and (b) are shown as means ± SE, n = 3.
