# Supplementary material for: Shade-induced nuclear localization of PIF7 is regulated by phosphorylation and 14-3-3 proteins in Arabidopsis
Source: eLife journal article supplement (doi:10.7554/elife.31636), 2018-06-21
Supplement: supp [file elife-31636-supp-v1.zip › elife_poa_e31636_Figure_6_figure_supplement_1.pdf]

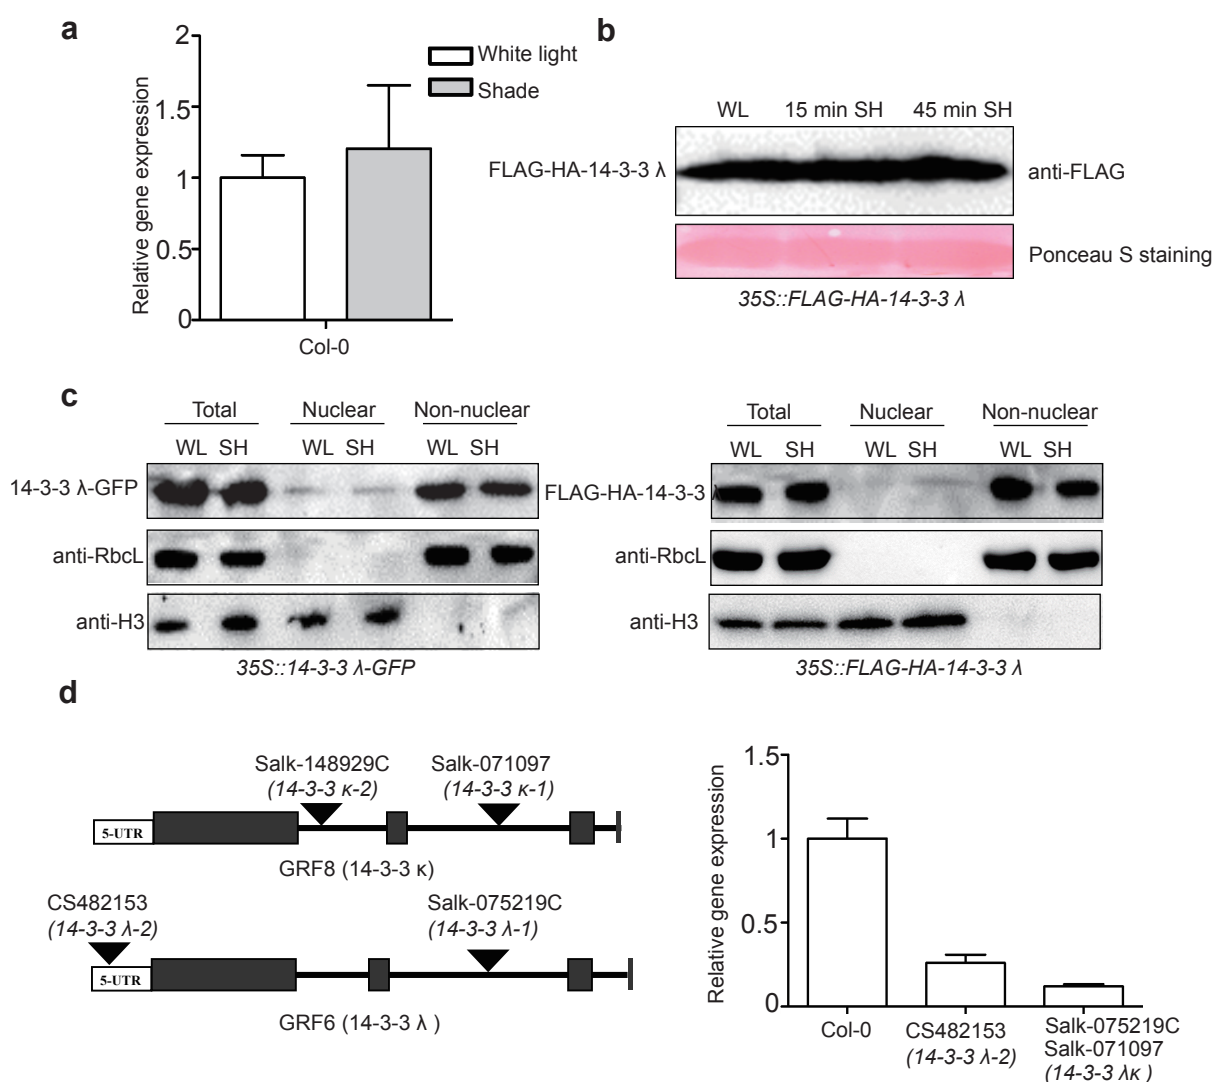

**Figure 6-figure supplement 1.** Effects of shade on the mRNA level, protein level and localization of 14-3-3 λ. (a) Relative gene expression of 14-3-3 λ in Col-0 grown under white light and shade. The seedlings were grown under white light for 5 days. Then, the seedlings were kept in white light or transferred to the shade for 1 hr for qRT-PCR. Mean ± SEs from three independent biological replicates, after normalization to the internal control *AT2G39960*, are shown. (b) Immunoblot of FLAG-HA-14-3-3 λ using anti-FLAG in white-light-grown and the shade-treated 35S::FLAG-HA-14-3-3 λ transgenic seedlings. The seedlings were grown under white light for 5 days. Then, the seedlings were kept in white light or transferred to the shade for 15 min or 45 min for western blotting. Ponceau S staining was used to display the loading control for western blotting. (c) Shade effects on the localization of 14-3-3 λ-GFP and FLAG-HA-14-3-3 λ. Immunoblot of the 14-3-3 λ-GFP proteins using anti-GFP antibody and FLAG-HA-14-3-3 λ proteins using anti-FLAG in the total, nuclear and non-nuclear fractions from white-light- and shade-treated seedlings. (d) T-DNA insertion sites and 14-3-3 λ expression level in 14-3-3 λ mutants used in Figure 6c.
